# Supplementary material
Source: PubMed Central journal article supplement (PMC7308163)

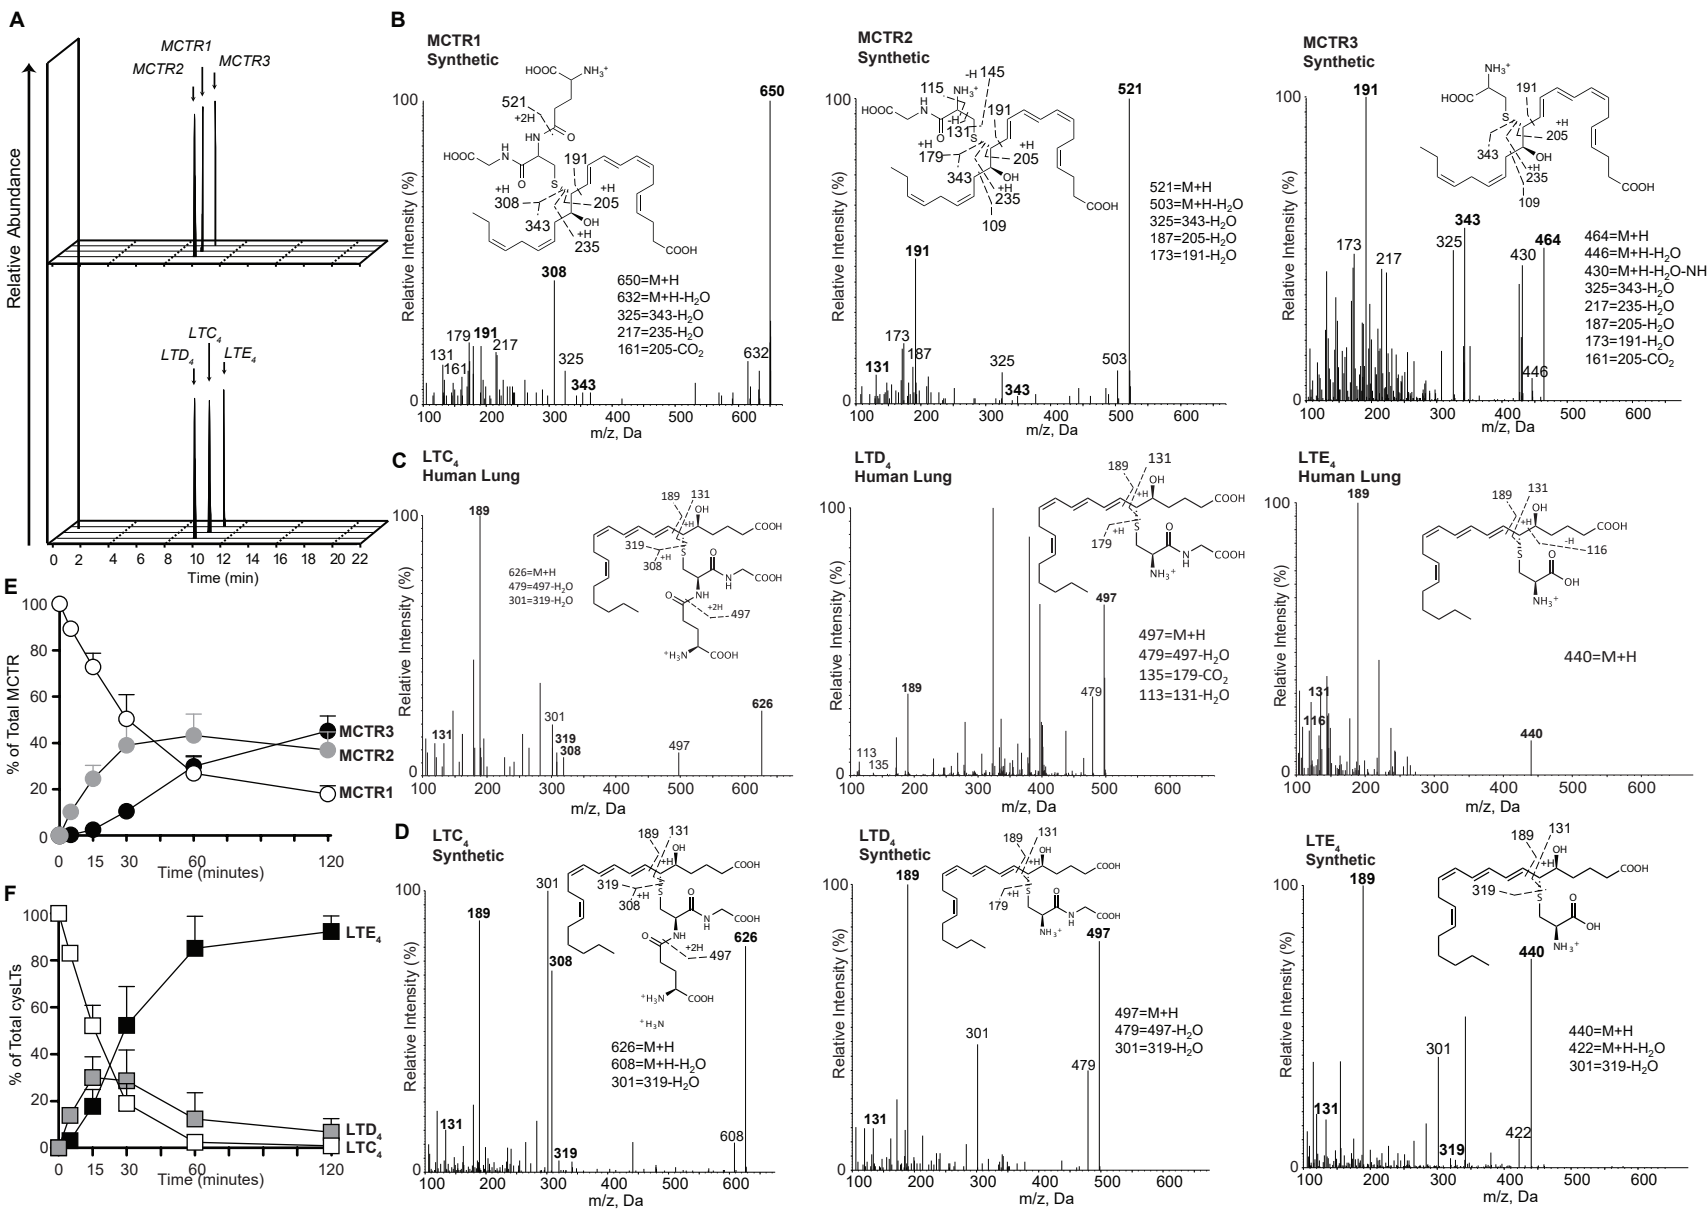

Supplement: NIHMS1545758-supplement-2.pdf [file NIHMS1545758-supplement-2.pdf]

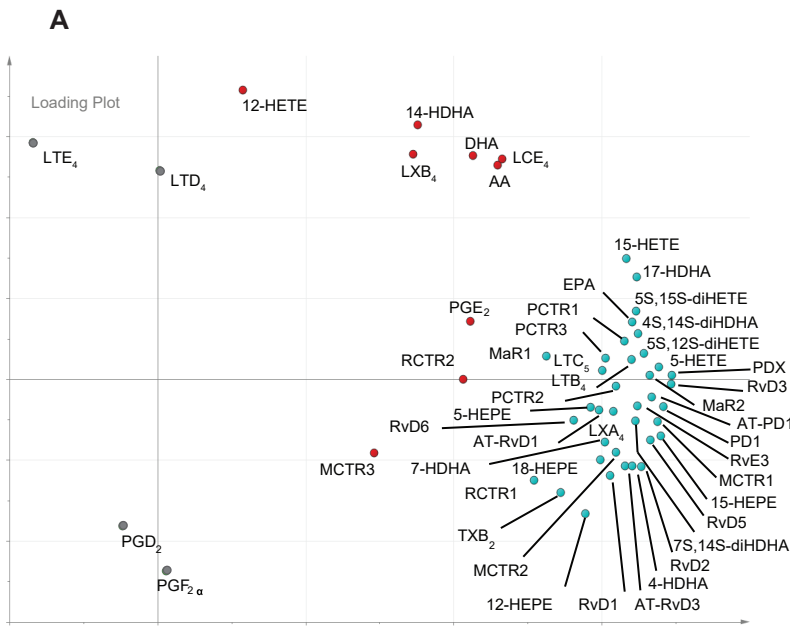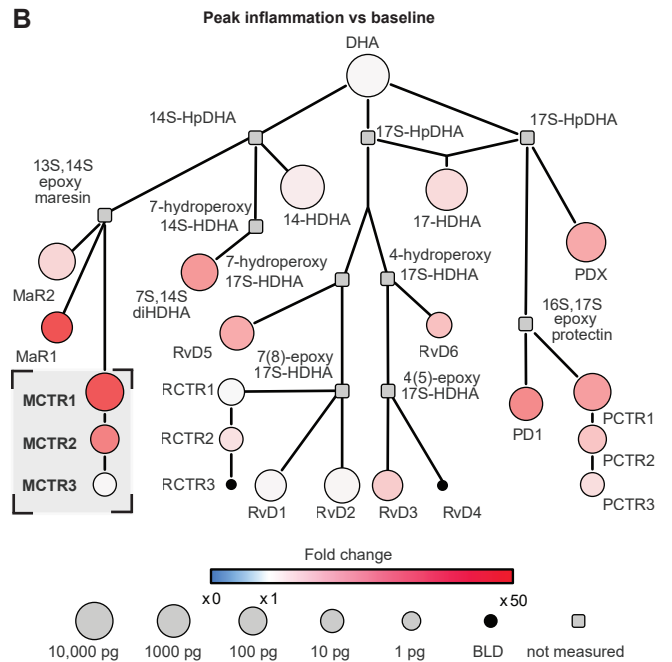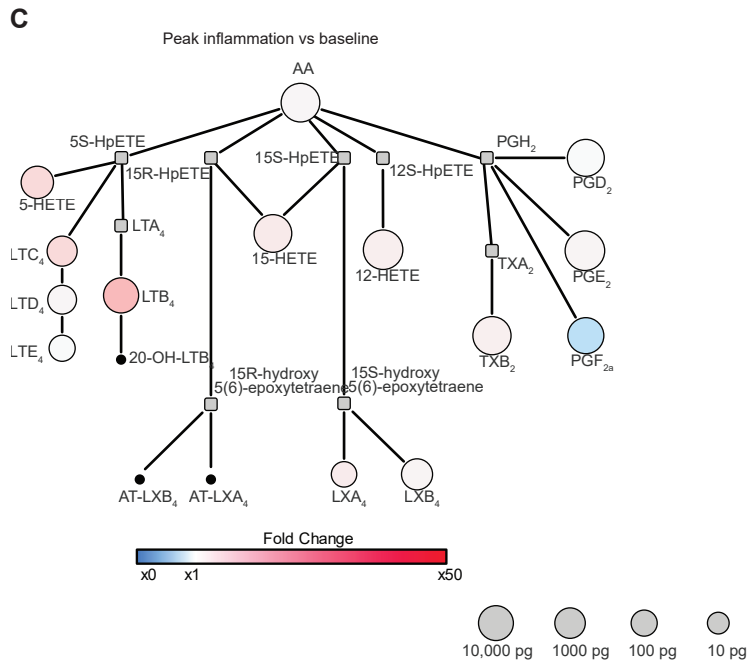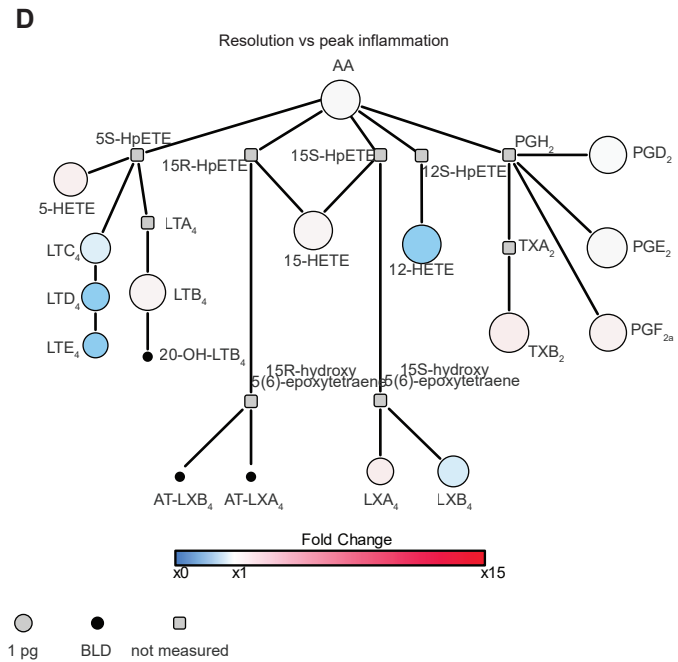

Supplement: NIHMS1545758-supplement-3.pdf [file NIHMS1545758-supplement-3.pdf]

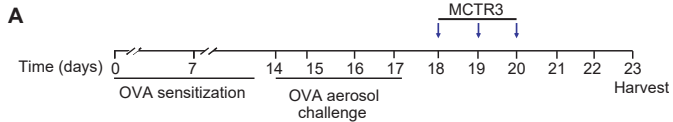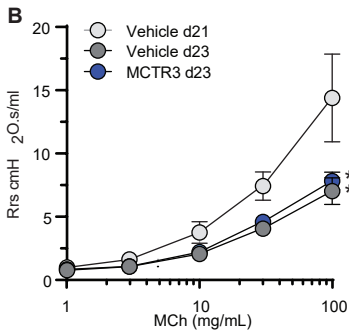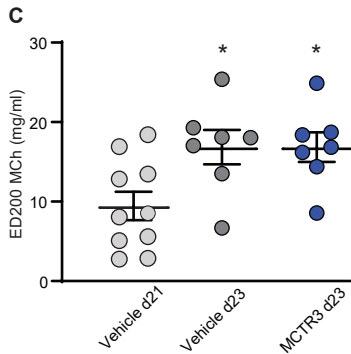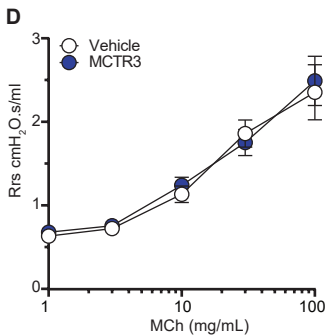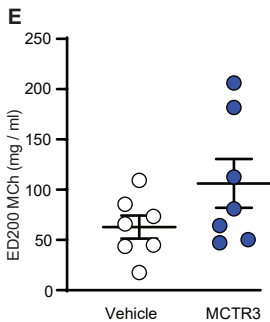

Supplement: NIHMS1545758-supplement-4.pdf [file NIHMS1545758-supplement-4.pdf]
